# Supplementary material for: Spontaneous surface adsorption of aqueous graphene oxide by synergy with surfactants
Source: Royal Society of Chemistry journal article supplement (doi:10.1039/d1cp04317j), 2021-12-13
Supplement: d1cp04317j1.pdf [file d1cp04317j1.pdf]

# ELECTRONIC SUPPLEMENTARY INFORMATION

## Spontaneous surface adsorption of aqueous graphene oxide by synergy with surfactants

Thomas M. McCoy,<sup>a,b,\*</sup> Alexander J. Armstrong,<sup>1</sup> Jackson E. Moore,<sup>b</sup>  
Stephen A. Holt,<sup>c</sup> Rico F. Tabor<sup>b</sup> and Alexander F. Routh<sup>a</sup>

<sup>a</sup>BP Institute and Department of Chemical Engineering and Biotechnology,  
University of Cambridge, CB3 0EZ, United Kingdom

<sup>b</sup>School of Chemistry,  
Monash University, Clayton 3800, Australia

<sup>c</sup>Australian Centre for Neutron Scattering,  
ANSTO, Lucas Heights, New South Wales 2234, Australia

\*To whom correspondence should be addressed; E-mail: tm657@cam.ac.uk

This document contains all fitting parameters and sample compositions for X-ray reflectivity (XRR) datasets generated from MOTOFIT.<sup>1</sup> In addition, Table 1 displays the comparison of results for nested sampling of three distinct datasets using either a two-layer or three-layer model. This analysis was performed using the *refnx*<sup>2</sup> and *dynesty*<sup>3</sup> Python computing packages.

### References

- [1] Nelson, A. Co-refinement of Multiple-Contrast Neutron/X-ray Reflectivity Data using *MOTOFIT*. *J. Appl. Crystallogr.* **2006** *39*, 273–276.
- [2] Nelson, A. R., Prescott, S. W. *refnx*: neutron and X-ray reflectometry analysis in Python. *J. Appl. Crystallogr.* **2019** *52*, 193–200.
- [3] Speagle, J. S. DYNESTY: a dynamic nested sampling package for estimating Bayesian posteriors and evidences. *Mon. Notices Royal Astron. Soc.* **2020** *493*, 3132–3158.

Table S1: Fitted values and Bayesian evidence for nested sampling of two versus three layer models for three distinct GO/surfactant compositions measured by XRR. Beside each fitted values are the model bounds for that parameter where  $\downarrow$  represents the lower bound and  $\uparrow$  represents the upper bound.

| [GO]<br>mg/mL | Surfactant                     | [Surf.]<br>mM | Layer 1                           |                                         |                               | Layer 2                           |                                         |                               | Layer 3                           |                                         |                               | Evidence<br>$\ln(Z)$ | Evidence<br>$\ln(\text{error})$ |
|---------------|--------------------------------|---------------|-----------------------------------|-----------------------------------------|-------------------------------|-----------------------------------|-----------------------------------------|-------------------------------|-----------------------------------|-----------------------------------------|-------------------------------|----------------------|---------------------------------|
|               |                                |               | Thickness<br>$\text{\AA}$         | SLD<br>$\times 10^{-6} \text{\AA}^{-2}$ | Roughness<br>$\text{\AA}$     | Thickness<br>$\text{\AA}$         | SLD<br>$\times 10^{-6} \text{\AA}^{-2}$ | Roughness<br>$\text{\AA}$     | Thickness<br>$\text{\AA}$         | SLD<br>$\times 10^{-6} \text{\AA}^{-2}$ | Roughness<br>$\text{\AA}$     |                      |                                 |
| 0.1           | OAPB                           | 0.2           | $22.9_{2\downarrow}^{30\uparrow}$ | $8.5_{8.0\downarrow}^{9.0\uparrow}$     | $6.7_{2\downarrow}^8\uparrow$ | $14.2_{2\downarrow}^{30\uparrow}$ | $11.1_{10.6\downarrow}^{11.6\uparrow}$  | $5.1_{2\downarrow}^8\uparrow$ | -                                 | -                                       | -                             | -24.3                | 0.19                            |
| 0.1           | OAPB                           | 0.2           | $18.1_{2\downarrow}^{30\uparrow}$ | $8.5_{8.0\downarrow}^{9.0\uparrow}$     | $6.6_{2\downarrow}^8\uparrow$ | $8.1_{2\downarrow}^{30\uparrow}$  | $9.4_{8.0\downarrow}^{11.6\uparrow}$    | $5.1_{2\downarrow}^8\uparrow$ | $11.7_{2\downarrow}^{30\uparrow}$ | $11.1_{10.6\downarrow}^{11.6\uparrow}$  | $4.7_{2\downarrow}^8\uparrow$ | -25.0                | 0.20                            |
| 1.0           | TX-100                         | 1.0           | $12.4_{2\downarrow}^{30\uparrow}$ | $6.8_{6.3\downarrow}^{7.3\uparrow}$     | $5.5_{2\downarrow}^8\uparrow$ | $23.7_{2\downarrow}^{30\uparrow}$ | $11.9_{11.3\downarrow}^{12.3\uparrow}$  | $6.7_{2\downarrow}^8\uparrow$ | -                                 | -                                       | -                             | -22.0                | 0.20                            |
| 1.0           | TX-100                         | 1.0           | $9.0_{2\downarrow}^{30\uparrow}$  | $6.8_{6.3\downarrow}^{7.3\uparrow}$     | $5.8_{2\downarrow}^8\uparrow$ | $9.5_{2\downarrow}^{30\uparrow}$  | $10.5_{6.3\downarrow}^{12.3\uparrow}$   | $5.9_{2\downarrow}^8\uparrow$ | $17.5_{2\downarrow}^{30\uparrow}$ | $11.9_{11.3\downarrow}^{12.3\uparrow}$  | $5.2_{2\downarrow}^8\uparrow$ | -22.9                | 0.21                            |
| 1.0           | C <sub>12</sub> E <sub>6</sub> | 1.0           | $12.7_{2\downarrow}^{30\uparrow}$ | $5.6_{5.1\downarrow}^{6.1\uparrow}$     | $5.5_{2\downarrow}^8\uparrow$ | $24.8_{2\downarrow}^{30\uparrow}$ | $12.2_{11.7\downarrow}^{12.7\uparrow}$  | $7.2_{2\downarrow}^8\uparrow$ | -                                 | -                                       | -                             | -31.4                | 0.21                            |
| 1.0           | C <sub>12</sub> E <sub>6</sub> | 1.0           | $9.1_{2\downarrow}^{30\uparrow}$  | $5.6_{5.1\downarrow}^{6.1\uparrow}$     | $5.8_{2\downarrow}^8\uparrow$ | $9.8_{2\downarrow}^{30\uparrow}$  | $9.8_{5.1\downarrow}^{12.7\uparrow}$    | $6.4_{2\downarrow}^8\uparrow$ | $19.3_{2\downarrow}^{30\uparrow}$ | $12.3_{11.7\downarrow}^{12.7\uparrow}$  | $5.9_{2\downarrow}^8\uparrow$ | -31.9                | 0.22                            |

Table S2: Fitting parameters used to model XRR datasets of GO/TX-100 systems in MOTOFIT.

| [GO]<br>mg/mL | [TX-100]<br>mM | [NaCl]<br>mM | Layer 1        |                                          |                | Layer 2        |                                          |                |
|---------------|----------------|--------------|----------------|------------------------------------------|----------------|----------------|------------------------------------------|----------------|
|               |                |              | Thickness<br>Å | SLD<br>$\times 10^{-6} \text{ \AA}^{-2}$ | Roughness<br>Å | Thickness<br>Å | SLD<br>$\times 10^{-6} \text{ \AA}^{-2}$ | Roughness<br>Å |
| -             | 10.0           | -            | 6.7            | 5.5                                      | 3.2            | 3.8            | 10.9                                     | 3.1            |
| 0.1           | 0.1            | -            | 4.6            | 7.9                                      | 7.1            | 9.4            | 10.8                                     | 4.0            |
| 0.1           | 0.2            | -            | 7.1            | 5.4                                      | 3.7            | 7.4            | 10.8                                     | 2.9            |
| 0.1           | 0.5            | -            | 4.2            | 6.2                                      | 4.2            | 10.2           | 11.4                                     | 4.5            |
| 0.1           | 1.0            | -            | 6.5            | 5.1                                      | 4.3            | 9.6            | 10.2                                     | 4.3            |
| 0.5           | 0.5            | -            | 4.3            | 6.3                                      | 4.1            | 9.7            | 11.8                                     | 6.6            |
| 0.75          | 0.75           | -            | 7.4            | 7.6                                      | 4.7            | 29.1           | 11.2                                     | 2.2            |
| 1.0           | 1.0            | -            | 10.7           | 6.8                                      | 5.9            | 25.0           | 11.8                                     | 7.7            |
| 1.0           | 5.0            | -            | 5.8            | 8.0                                      | 3.7            | 12.3           | 10.3                                     | 3.1            |
| 1.0           | 5.0            | 2.0          | 6.2            | 6.5                                      | 3.2            | 12.1           | 9.7                                      | 3.1            |
| 0.5           | 0.5            | 2.0          | 15.5           | 8.4                                      | 7.3            | 17.3           | 11.8                                     | 2.3            |
| 0.5           | 0.5            | 5.0          | 6.4            | 7.2                                      | 5.8            | 27.9           | 10.8                                     | 7.6            |
| 0.5           | 0.5            | 10           | 4.9            | 6.4                                      | 3.8            | 32.4           | 11.7                                     | 4.3            |

Table S3: Fitting parameters used to model XRR datasets of GO/C<sub>12</sub>E<sub>6</sub> systems in MOTOFIT.

| [GO]<br>mg/mL | [C <sub>12</sub> E <sub>6</sub> ]<br>mM | Layer 1        |                                          |                | Layer 2        |                                          |                |
|---------------|-----------------------------------------|----------------|------------------------------------------|----------------|----------------|------------------------------------------|----------------|
|               |                                         | Thickness<br>Å | SLD<br>$\times 10^{-6} \text{ \AA}^{-2}$ | Roughness<br>Å | Thickness<br>Å | SLD<br>$\times 10^{-6} \text{ \AA}^{-2}$ | Roughness<br>Å |
| -             | 1.0                                     | 7.6            | 5.9                                      | 3.5            | 11.4           | 10.4                                     | 4.4            |
| 0.1           | 0.1                                     | 4.1            | 6.1                                      | 4.8            | 18.2           | 10.0                                     | 4.6            |
| 0.1           | 0.2                                     | 5.9            | 5.9                                      | 4.9            | 11.3           | 10.9                                     | 5.4            |
| 0.1           | 0.5                                     | 6.6            | 7.5                                      | 5.5            | 10.0           | 10.9                                     | 6.7            |
| 0.1           | 1.0                                     | 5.1            | 6.6                                      | 4.2            | 13.3           | 10.9                                     | 6.9            |
| 0.5           | 0.5                                     | 9.4            | 5.2                                      | 3.6            | 8.2            | 12.0                                     | 3.8            |
| 0.75          | 0.75                                    | 2.4            | 5.2                                      | 7.0            | 23.9           | 10.5                                     | 5.0            |
| 1.0           | 0.2                                     | 9.4            | 7.9                                      | 5.8            | 24.0           | 12.3                                     | 4.7            |
| 1.0           | 0.5                                     | 12.5           | 7.8                                      | 6.5            | 21.0           | 12.0                                     | 5.4            |
| 1.0           | 1.0                                     | 12.9           | 5.6                                      | 5.2            | 24.6           | 12.2                                     | 7.1            |
| 1.0           | 2.0                                     | 10.4           | 6.2                                      | 4.7            | 24.9           | 10.7                                     | 5.8            |
| 1.0           | 5.0                                     | 4.9            | 6.5                                      | 7.1            | 18.1           | 10.4                                     | 4.0            |

Table S4: Fitting parameters used to model XRR datasets of GO/OAPB systems in MOTOFIT.

| [GO]<br>mg/mL | [OAPB]<br>mM | Layer 1        |                                        |                | Layer 2        |                                        |                |
|---------------|--------------|----------------|----------------------------------------|----------------|----------------|----------------------------------------|----------------|
|               |              | Thickness<br>Å | SLD<br>$\times 10^{-6} \text{ Å}^{-2}$ | Roughness<br>Å | Thickness<br>Å | SLD<br>$\times 10^{-6} \text{ Å}^{-2}$ | Roughness<br>Å |
| -             | 1.0          | 8.8            | 7.3                                    | 5.7            | 7.0            | 11.0                                   | 3.8            |
| 0.025         | 0.05         | 13.4           | 8.0                                    | 3.4            | 17.0           | 10.6                                   | 6.2            |
| 0.05          | 0.1          | 15.8           | 7.3                                    | 4.2            | 17.3           | 11.0                                   | 6.1            |
| 0.1           | 0.05         | 8.8            | 6.9                                    | 5.5            | 25.1           | 11.8                                   | 5.6            |
| 0.1           | 0.1          | 10.2           | 6.8                                    | 5.9            | 20.8           | 11.5                                   | 4.5            |
| 0.1           | 0.2          | 22.2           | 8.5                                    | 6.6            | 15.7           | 11.1                                   | 4.9            |
| 0.1           | 0.5          | 8.5            | 8.6                                    | 4.8            | 10.7           | 11.5                                   | 6.5            |
| 0.2           | 0.4          | 14.8           | 7.5                                    | 7.1            | 8.9            | 11.2                                   | 7.1            |
| 0.5           | 1.0          | 20.2           | 6.9                                    | 7.7            | 2.2            | 12.0                                   | 8.0            |

Table S5: Fitting parameters used to model XRR datasets of GO/anionic surfactant systems in MOTOFIT.

| [GO]<br>mg/mL | Surfactant | [Surf.]<br>mM | Layer 1        |                                        |                | Layer 2        |                                        |                |
|---------------|------------|---------------|----------------|----------------------------------------|----------------|----------------|----------------------------------------|----------------|
|               |            |               | Thickness<br>Å | SLD<br>$\times 10^{-6} \text{ Å}^{-2}$ | Roughness<br>Å | Thickness<br>Å | SLD<br>$\times 10^{-6} \text{ Å}^{-2}$ | Roughness<br>Å |
| -             | SDS        | 10.0          | 5.3            | 5.9                                    | 5.0            | 14.7           | 12.8                                   | 6.8            |
| 1.0           | SDS        | 0.5           | 6.7            | 6.6                                    | 5.3            | 15.6           | 12.7                                   | 5.0            |
| 1.0           | SDS        | 1.0           | 6.9            | 5.3                                    | 4.4            | 16.0           | 12.9                                   | 5.8            |
| -             | AOT        | 10.0          | 3.0            | 5.8                                    | 4.1            | 14.3           | 10.7                                   | 3.8            |
| 1.0           | AOT        | 0.5           | 1.5            | 7.2                                    | 3.9            | 14.3           | 11.2                                   | 3.7            |
| 1.0           | AOT        | 1.0           | 2.7            | 6.4                                    | 3.7            | 14.1           | 11.2                                   | 4.1            |
